# Supplementary material for: Extraction of Pd(ii) and Pt(ii) from aqueous hydrochloric acid with 1,3-diaminocalix[4]arene: switching of the extraction selectivity by using different extraction modes
Source: Royal Society of Chemistry journal article supplement (doi:10.1039/d0ra05339b), 2020-01-01
Supplement: d0ra05339b1.pdf [file d0ra05339b1.pdf]

## Supporting Information

Extraction of Pd(II) and Pt(II) from aqueous hydrochloric acid with  
1,3-diaminocalix[4]arene: Switching of the extraction selectivity by using  
different extraction modes

Naoya Morohashi,\* Yu Kurusu, Kosuke Akasaka and Tetsutaro Hattori\*

*Department of Biomolecular Engineering, Graduate School of Engineering,  
Tohoku University, 6-6-11 Aramaki-Aoba, Aoba-ku, Sendai 980-8579, Japan*

### Contents:

|     |                                                                       |       |    |
|-----|-----------------------------------------------------------------------|-------|----|
| I.  | Solvent extraction                                                    | ..... | S2 |
| II. | <sup>1</sup> H and <sup>13</sup> C NMR of synthesized metal complexes | ..... | S6 |

## I. Solvent extraction

**Table S1** Dependence of  $E\%$  on  $[\text{HCl}]$  for the extraction of Pt(IV), Rh(III) and Ir(IV) with compound **2**.

| $[\text{HCl}] / \text{M}$ | $E\%$ [Pt(IV)] | $E\%$ [Rh(III)] | $E\%$ [Ir(IV)] |
|---------------------------|----------------|-----------------|----------------|
| 0.001                     | 8              | 6               | 37             |
| 0.01                      | 44             | 14              | 30             |
| 1                         | 57             | 23              | 30             |
| 4                         | 10             | 33              | 19             |
| 7                         | 5              | 14              | 21             |

Aq. phase:  $[\text{Metal}]_{\text{aq,init}} = 1.0 \times 10^{-4}$  M. Org. phase:  $\text{CHCl}_3$ ,  $[\mathbf{2}]_{\text{org,init}} = 1.0 \times 10^{-3}$  M.

**Table S2** Dependence of  $E\%$  on  $[\text{HCl}]$  for the extraction of Pd(II), Pt(II), Pt(IV), Rh(III) and Ir(IV) with compound **3**.

| $[\text{HCl}] / \text{M}$ | $E\%$ [Pd(II)] | $E\%$ [Pt(II)] | $E\%$ [Pt(IV)] | $E\%$ [Rh(III)] | $E\%$ [Ir(IV)] |
|---------------------------|----------------|----------------|----------------|-----------------|----------------|
| 0.001                     | 19             | 0              | 3              | 8               | 15             |
| 0.01                      | 23             | 15             | 18             | 12              | 8              |
| 1                         | 17             | 16             | 14             | 15              | 12             |
| 4                         | 12             | 10             | 8              | 12              | 14             |
| 7                         | 9              | 8              | 13             | 10              | 20             |

Aq. phase:  $[\text{Metal}]_{\text{aq,init}} = 1.0 \times 10^{-4}$  M. Org. phase:  $\text{CHCl}_3$ ,  $[\mathbf{3}]_{\text{org,init}} = 1.0 \times 10^{-3}$  M.

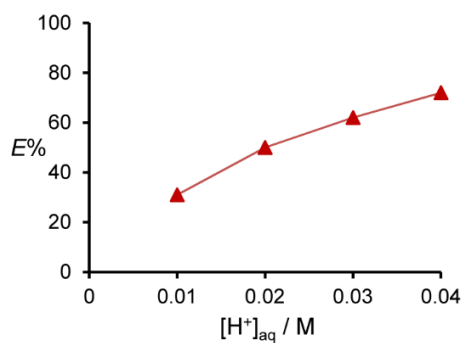

**Fig. S1** Dependence of  $E\%$  on  $[H^+]$  for the extraction of Pt(II) with compound **2**. Aq. phase:  $[Metal]_{aq,init} = 1.0 \times 10^{-4}$  M,  $[Cl^-] = 0.04$  M.  $[H^+]$  and  $[Cl^-]$  was adjusted by the addition of HCl and LiCl. Org. phase:  $CHCl_3$ ,  $[2]_{org,init} = 1.0 \times 10^{-3}$  M.

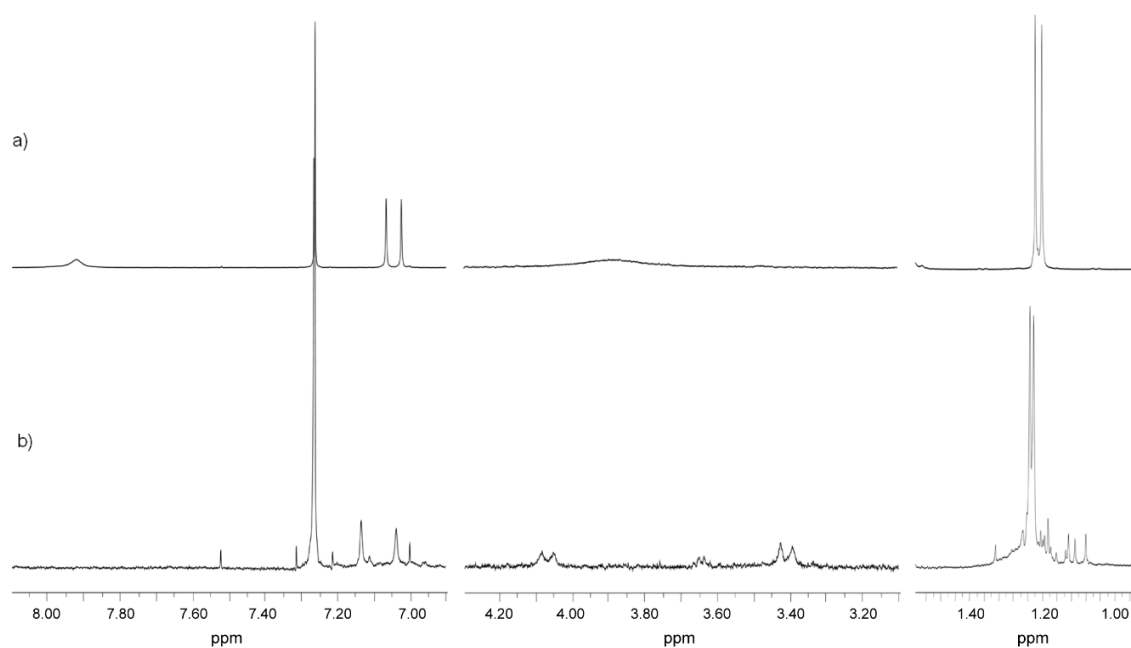

**Fig. S2** Partial  $^1H$  NMR spectra of  $CDCl_3$  solution of compound **2** before (a) and after (b) extraction of Pd(II). Condition for solvent extraction: Aq. phase:  $[Pd(II)]_{aq,init} = 1.0 \times 10^{-3}$  M,  $[HCl] = 0.001$  M. Org. phase:  $CDCl_3$ ,  $[2]_{org,init} = 1.0 \times 10^{-3}$  M.

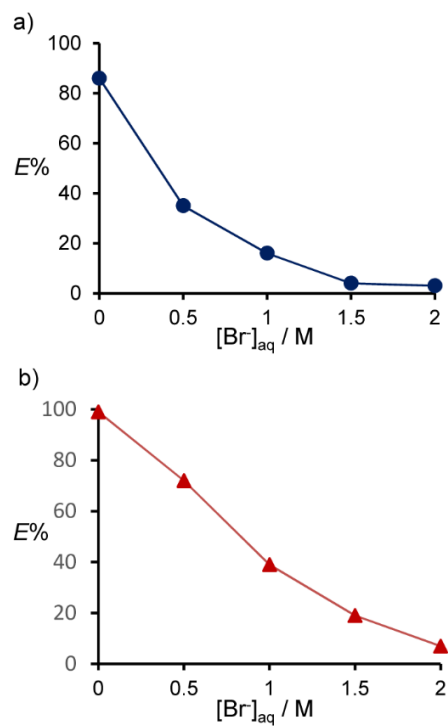

**Fig. S3** Dependence of  $E\%$  on  $[\text{Br}^-]$  for the extraction of Pd(II) (a) and Pt(II) (b) with compound **2**. Aq. phase:  $[\text{Metal}]_{\text{aq,init}} = 1.0 \times 10^{-4} \text{ M}$ ,  $[\text{HCl}] = 0.5 \text{ M}$ .  $[\text{Br}^-]$  was adjusted by the addition of KBr. Org. phase:  $\text{CHCl}_3$ ,  $[\mathbf{2}]_{\text{org,init}} = 1.0 \times 10^{-3} \text{ M}$ .

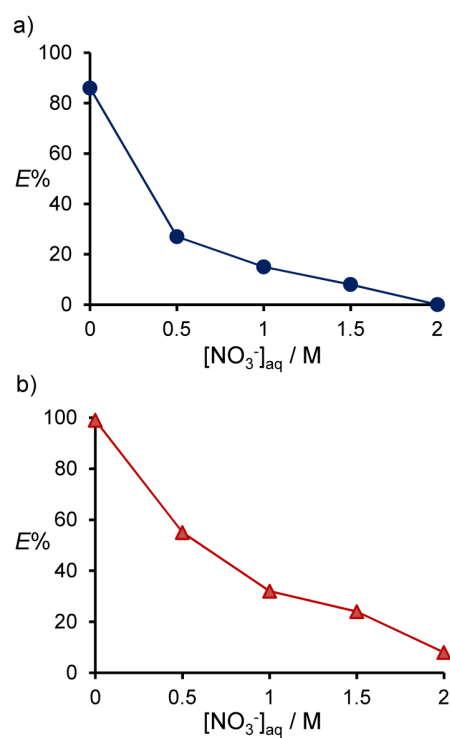

**Fig. S4** Dependence of  $E\%$  on  $[\text{NO}_3^-]$  for the extraction of Pd(II) (a) and Pt(II) (b) with compound **2**. Aq. phase:  $[\text{Metal}]_{\text{aq,init}} = 1.0 \times 10^{-4} \text{ M}$ ,  $[\text{HCl}] = 0.5 \text{ M}$ .  $[\text{NO}_3^-]$  was adjusted by the addition of  $\text{LiNO}_3$ . Org. phase:  $\text{CHCl}_3$ ,  $[\mathbf{2}]_{\text{org,init}} = 1.0 \times 10^{-3} \text{ M}$ .

## II. $^1\text{H}$ and $^{13}\text{C}$ NMR of synthesized metal complexes

### 1. [PdL]

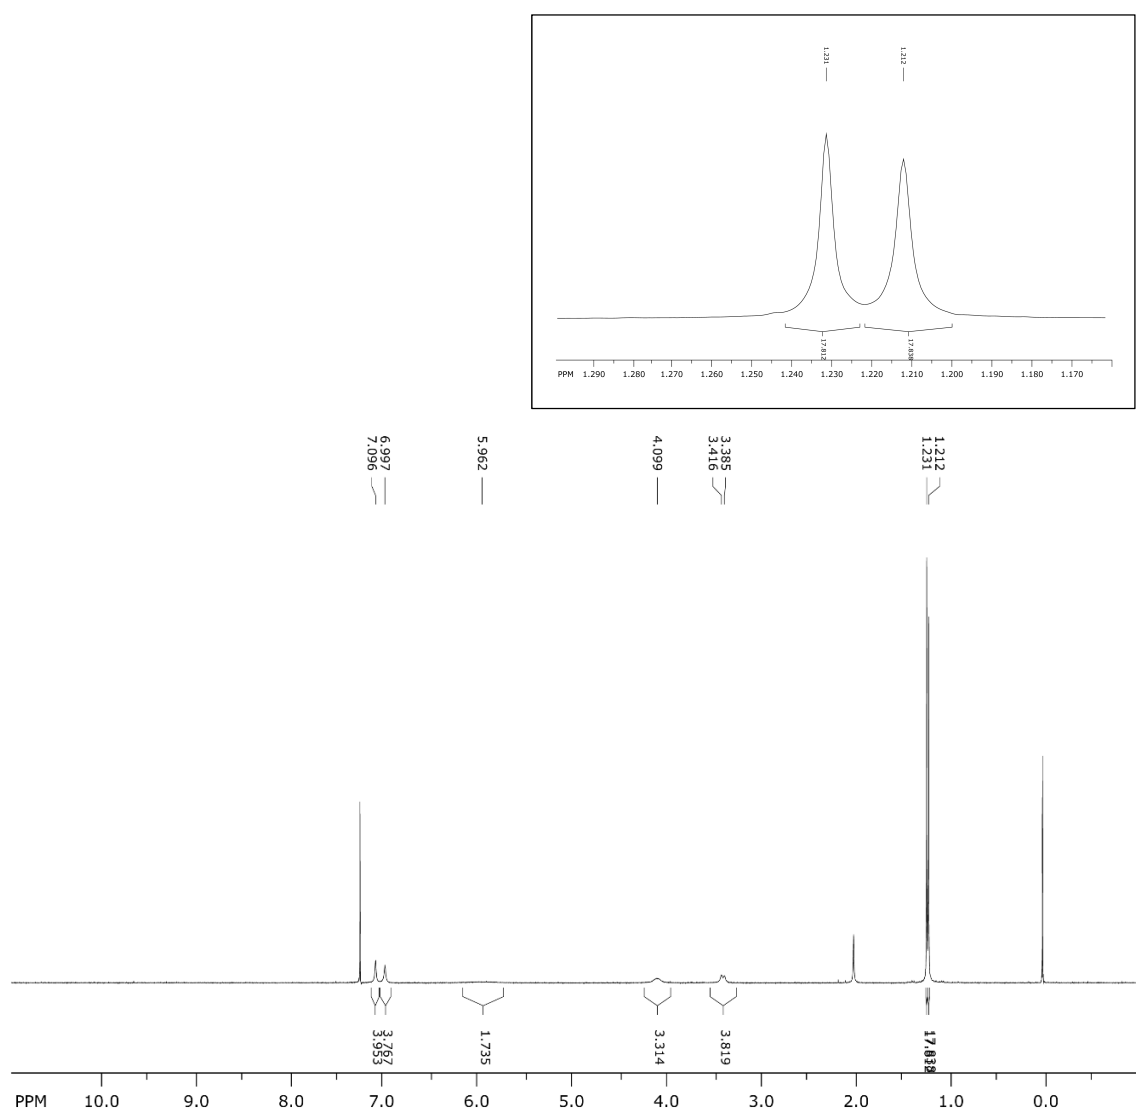

**Fig. S5**  $^1\text{H}$  NMR spectrum of [PdL] ( $\text{CDCl}_3$ , 400 MHz).

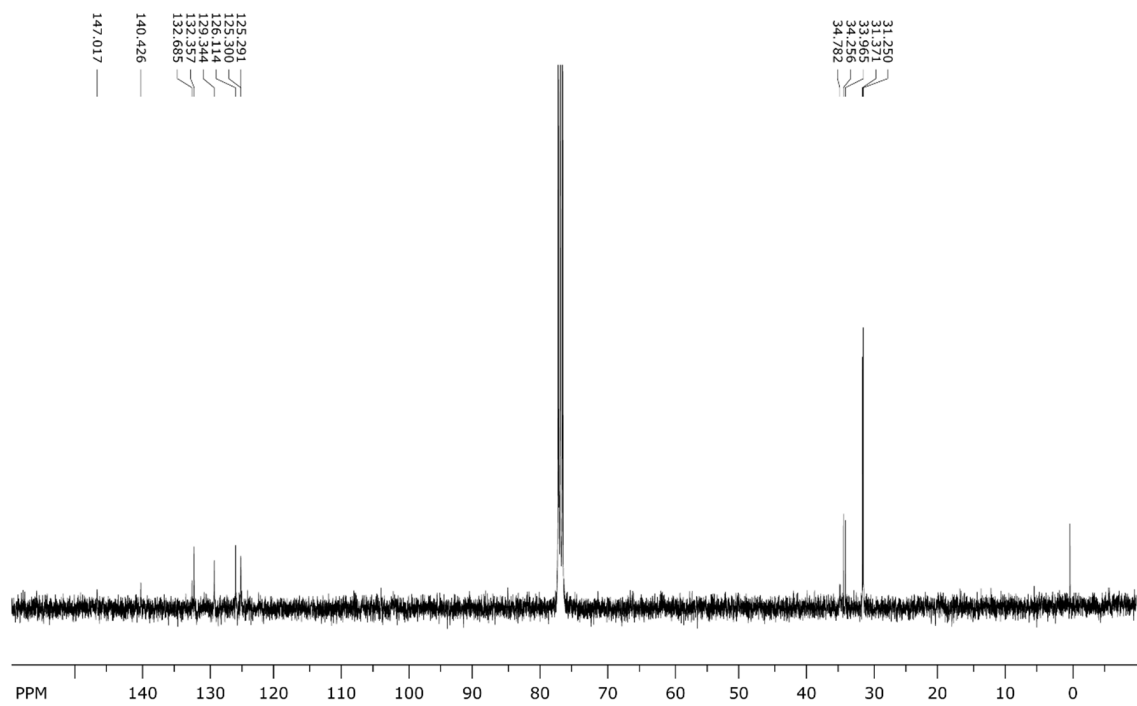

**Fig. S6**  $^{13}\text{C}$  NMR spectrum of [PdL] ( $\text{CDCl}_3$ , 100 MHz).

2.  $[\text{Pt}_2\text{Cl}_6(\text{H}_3\text{L})_2]$

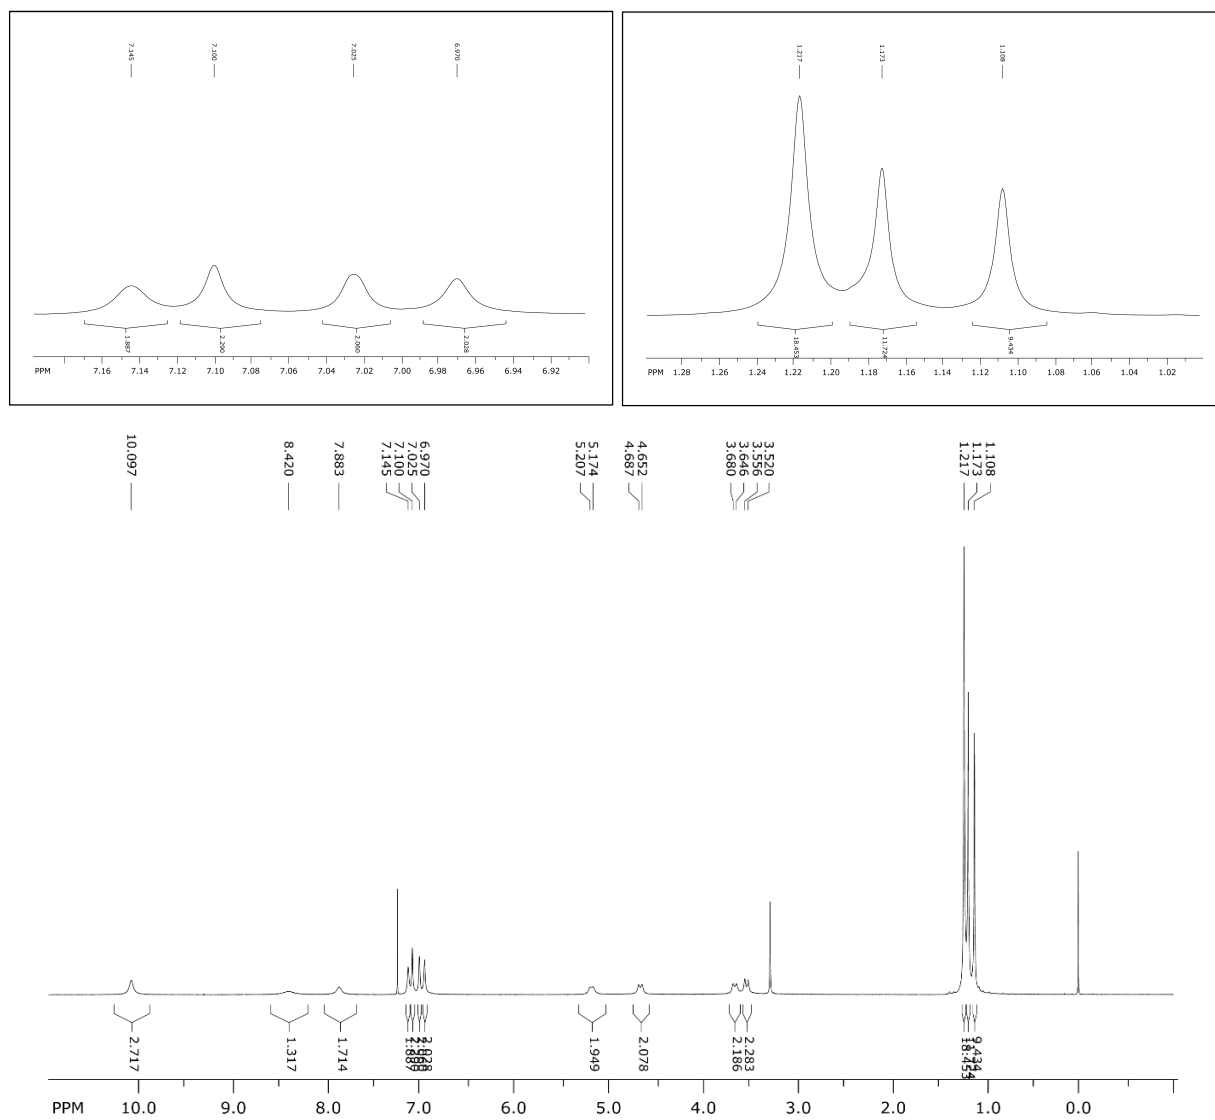

**Fig. S7**  $^1\text{H}$  NMR spectrum of  $[\text{Pt}_2\text{Cl}_6(\text{H}_3\text{L})_2]$  ( $\text{CDCl}_3$ , 400 MHz).



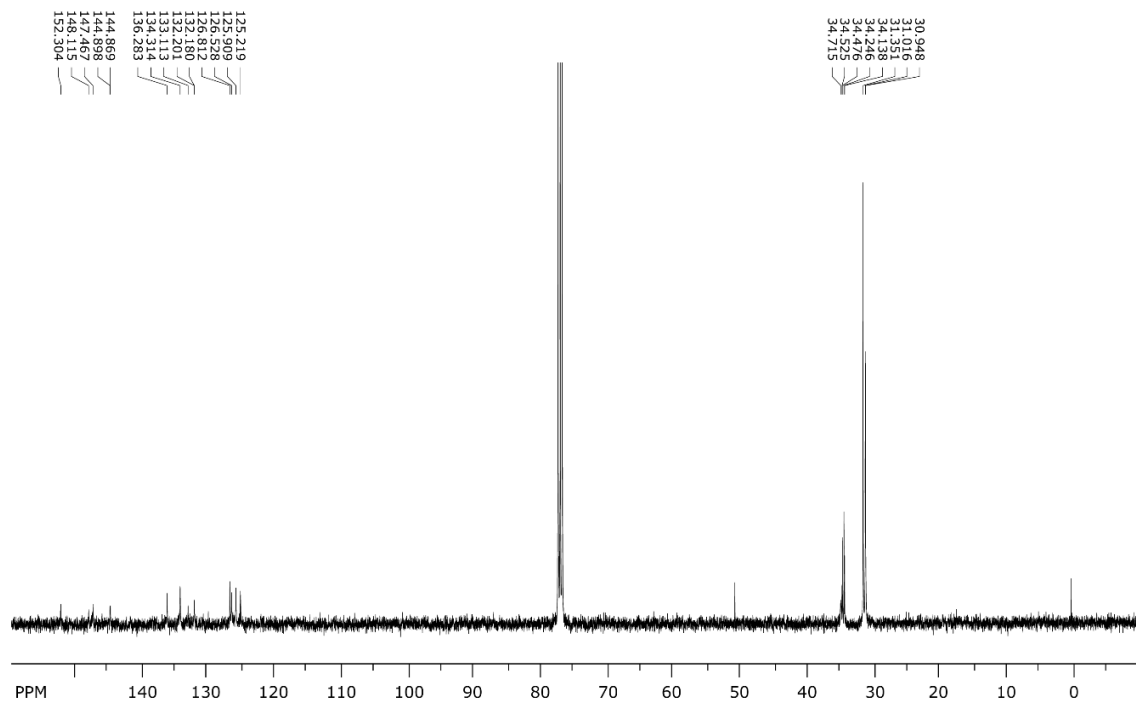

**Fig. S8** <sup>13</sup>C NMR spectrum of [Pt<sub>2</sub>Cl<sub>6</sub>(H<sub>3</sub>L)<sub>2</sub>] (CDCl<sub>3</sub>, 100 MHz).
